# Supplementary material for: Engineered autocrine signaling eliminates muscle cell FGF2 requirements for cultured meat production
Source: PubMed Central journal article supplement (PMC10153192; doi:10.1101/2023.04.17.537163), 2023-04-17
Supplement: media-1.pdf [file media-1.pdf]

## Supplementary Materials: Engineered autocrine signaling eliminates muscle cell FGF2 requirements for cultured meat production

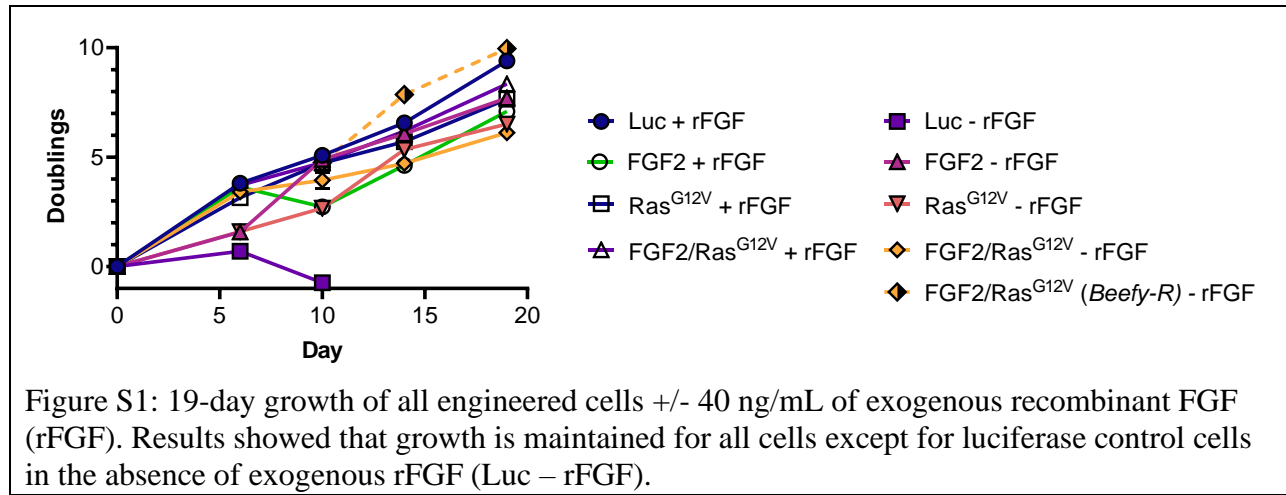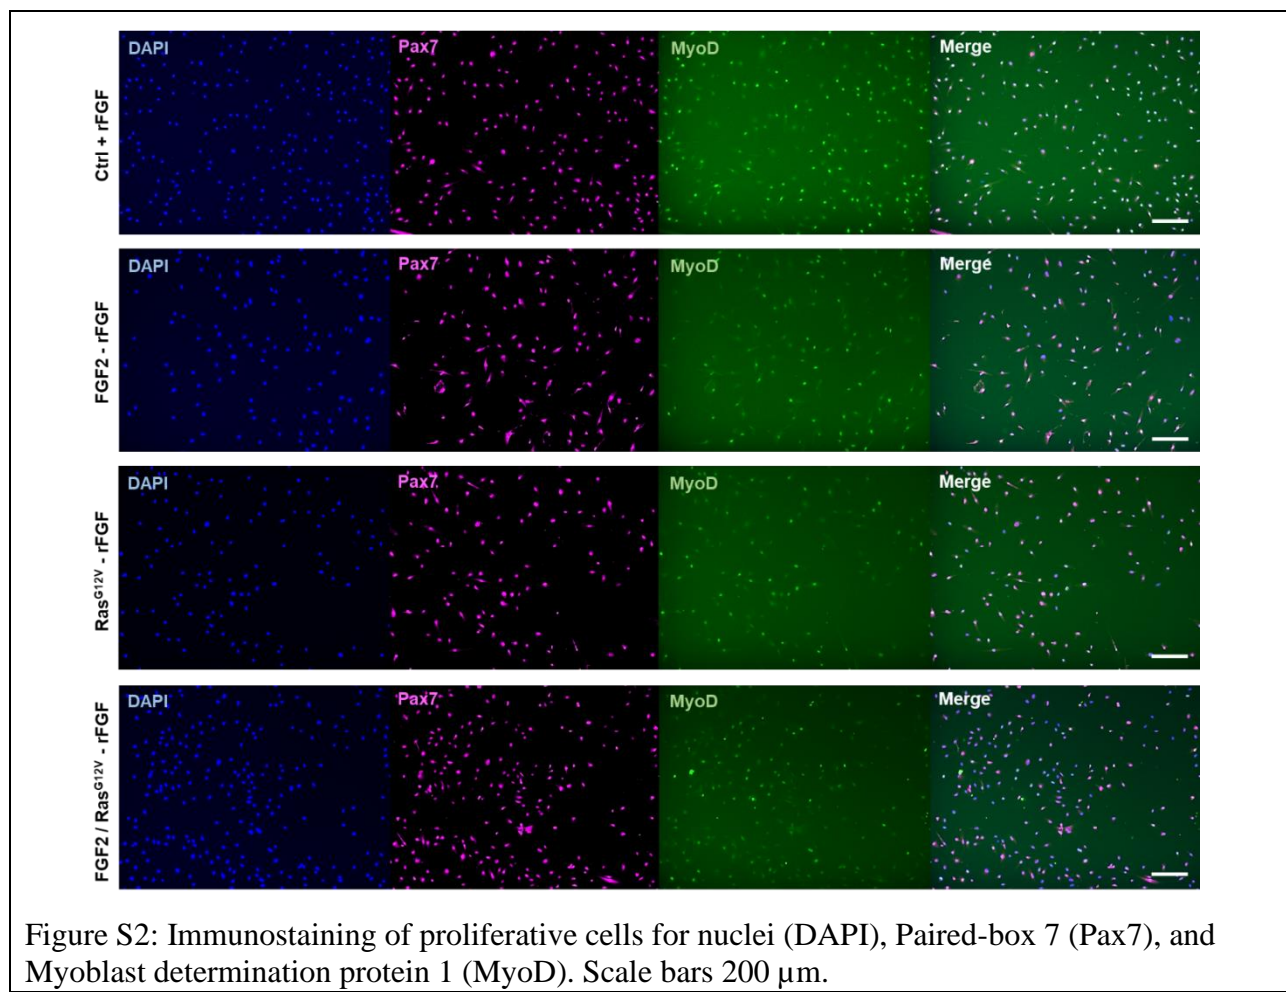

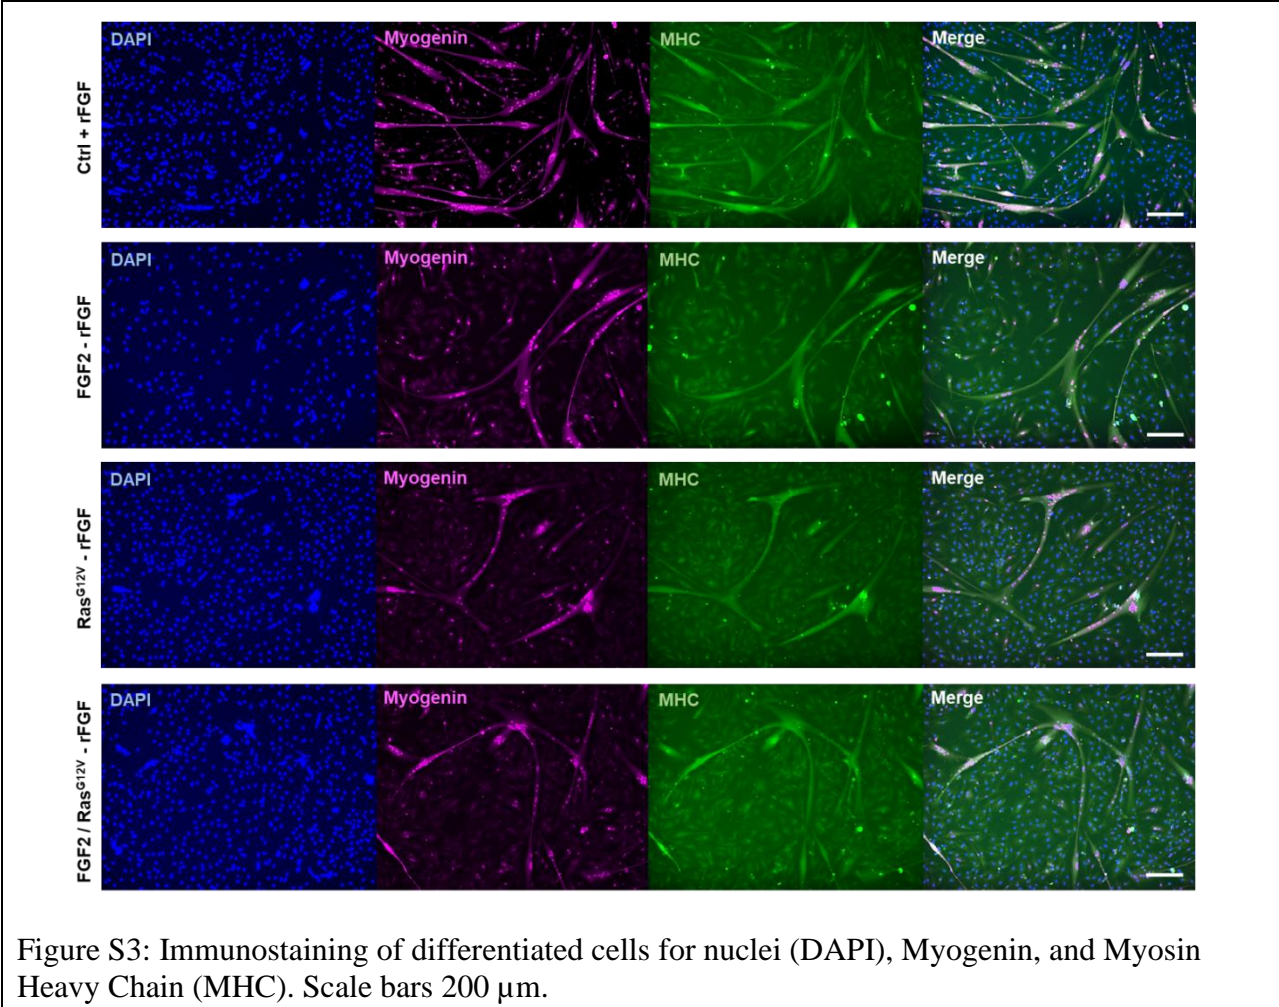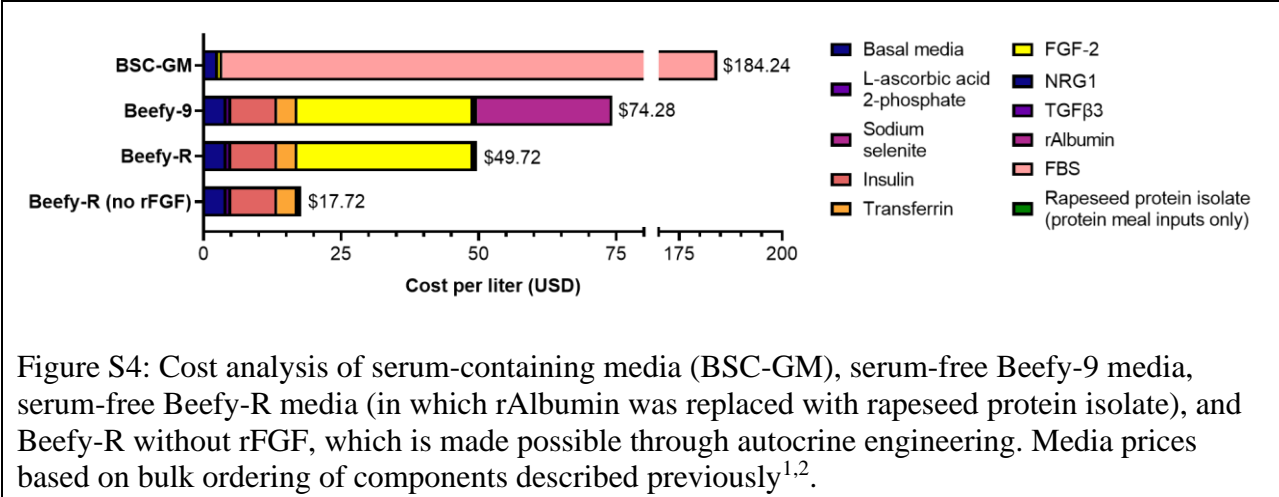

|                     |                                                                                                                                                                                                                                                                                                                                                                                                                                                                                                                                                                                                                         |
|---------------------|-------------------------------------------------------------------------------------------------------------------------------------------------------------------------------------------------------------------------------------------------------------------------------------------------------------------------------------------------------------------------------------------------------------------------------------------------------------------------------------------------------------------------------------------------------------------------------------------------------------------------|
| FGF2                | ATGGCGGCAGGTTCAATAACTACCCTGCCTGCTCTGCCTGAGGATGGCGGATCTGGTGCTTTTCCACCTGG<br>CCACTTCAAGGACCCCAAGAGGCTGTACTGCAAGAACGGCGGATTCTTCCTGAGGATTCACCCCGACGGA<br>AGAGTGGATGGCGTGC GCGAAAAGAGCGACCCTCACATCAAGCTGCAACTGCAGGCCGAAGAGAGAGGC<br>GTCGTACAGCATCAAAGGCGTGTGCGCCAATAGATACCTGGCCATGAAGGAAGATGGCAGGCTGCTGGCCT<br>CCAAATGCGTGACCGACGAGTGCTTCTTCTTCGAACGCCTGGAAAGCAACAACCTACAACACCTACAGAAG<br>CCGCAAGTACTCCTCTTGGTACGTGGCCCTGAAGAGGACCGGCCAGTACAAGCTGGGACCTAAGACAGGC<br>CCTGGACAGAAGGCCATCCTGTTCCCTTCCAATGTCCGCCAAAAGTggatctggcgaagcagagctctctgcatgtggcga<br>cgtggaagagaacctggacct                                               |
| Ras <sup>G12V</sup> | ATGACGGAATATAAGCTGGTGGTGGTGGGCGCCGTCGGTGTGGGCAAGAGTGC GCTGACCATCCAGCTGA<br>TCCAGAACCATTTGTGGACGAATACGACCCCACTATAGAGGATTCTACCGGAAGCAGGTGGTCATTGA<br>TGGGGAGACGTGCCTGTTGGACATCCTGGATACCGCCGGCCAGGAGGAGTACAGCGCCATGCGGGACCA<br>GTACATGCGCACCGGGGAGGGCTTCTGTGTGTGTTTGCATCAACAACACCAAGTCTTTTGAGGACATCC<br>ACCAAGTACAGGGAGCAGATCAAACGGGTGAAGGACTCGGATGACGTGCCCATGGTGCTGGTGGGGAACA<br>AGTGTGACCTGGCTGCACGCACTGTGGAATCTCGGCAGGCTCAGGACCTCGCCGAAGCTACGGCATCCC<br>CTACATCGAGACCTCGGCCAAGACCCGGCAGGGAGTGGAGGATGCCTTCTACACGTTGGTGC GTGAGATC<br>CGGCAGCACAAGCTGCGGAAGCTGAACCCTCCTGATGAGAGTGGCCCCGGCTGCATGAGCTGCAAGTGTG<br>TGCTCTCTAA |

Table S1: Genes used. Gene sequences used in constructs (upper case), followed by 2A linker sequences used after FGF-2 for bi-cistronic expression with Ras<sup>G12V</sup> (lower case).

| Component                                       | Concentration     | Supplier               | Catalog #             |
|-------------------------------------------------|-------------------|------------------------|-----------------------|
| <b>DMEM/F12 basal media</b>                     | <b>N/A</b>        | <b>ThermoFisher</b>    | <b>11320033</b>       |
| <b>2-Phospho-L-ascorbic acid trisodium salt</b> | <b>200 µg/mL</b>  | <b>Sigma</b>           | <b>49752-10G</b>      |
| <b>Insulin (human, recombinant)</b>             | <b>20 µg/mL</b>   | <b>Sigma</b>           | <b>91077C-250MG</b>   |
| <b>Transferrin (human, recombinant)</b>         | <b>20 µg/mL</b>   | <b>InVitria</b>        | <b>777TRF029</b>      |
| <b>Sodium selenite</b>                          | <b>20 ng/mL</b>   | <b>Sigma</b>           | <b>S5261-10G</b>      |
| <b>Fibroblast growth factor (FGF-2)</b>         | <b>40 ng/mL</b>   | <b>PeptoTech</b>       | <b>100-18B</b>        |
| <b>Neuregulin (NRG1)</b>                        | <b>0.1 ng/mL</b>  | <b>PeptoTech</b>       | <b>100-03</b>         |
| <b>Transforming growth factor (TGFβ3)</b>       | <b>0.1 ng/mL</b>  | <b>R&amp;D Systems</b> | <b>8420-B3-005/CF</b> |
| <b>UltraPure Water</b>                          | <b>5.8% (v/v)</b> | <b>ThermoFisher</b>    | <b>10977015</b>       |
| <b>Antibiotic/Antimycotic</b>                   | <b>1% (v/v)</b>   | <b>ThermoFisher</b>    | <b>1540062</b>        |
| <b>Recombinant albumin</b>                      | <b>0.8 mg/mL</b>  | <b>Sigma</b>           | <b>A9731-1G</b>       |

Table S2: Components of the various media used throughout this study. “Beefy-9 + FGF” had all components, “Beefy-9 – FGF” had all components except FGF-2, “B8 + FGF” had all components except recombinant albumin, and “B8 – FGF” had all components except FGF-2 and recombinant albumin.

## References

1. Stout, A. J. *et al.* Simple and effective serum-free medium for sustained expansion of bovine satellite cells for cell cultured meat. *Commun Biol* **5**, 1–13 (2022).
2. Stout, A. J. *et al.* A Beefy-R culture medium: replacing albumin with rapeseed protein isolates. 2022.09.02.506409 Preprint at <https://doi.org/10.1101/2022.09.02.506409> (2022).
